# Supplementary material for: Neonatal diabetes mutations disrupt a chromatin pioneering function that activates the human insulin gene
Source: PubMed Central journal article supplement — Cell Rep. 2021 Apr 13;35(2):108981. doi: 10.1016/j.celrep.2021.108981 (PMC8052186; doi:10.1016/j.celrep.2021.108981), 2021-04-13
Supplement: mmc1.pdf [file mmc1.pdf]

**Cell Reports, Volume 35**

**Supplemental information**

**Neonatal diabetes mutations disrupt  
a chromatin pioneering function  
that activates the human insulin gene**

**Ildem Akerman, Miguel Angel Maestro, Elisa De Franco, Vanessa Grau, Sarah Flanagan, Javier García-Hurtado, Gerhard Mittler, Philippe Ravassard, Lorenzo Piemonti, Sian Ellard, Andrew T. Hattersley, and Jorge Ferrer**

# Figure S1

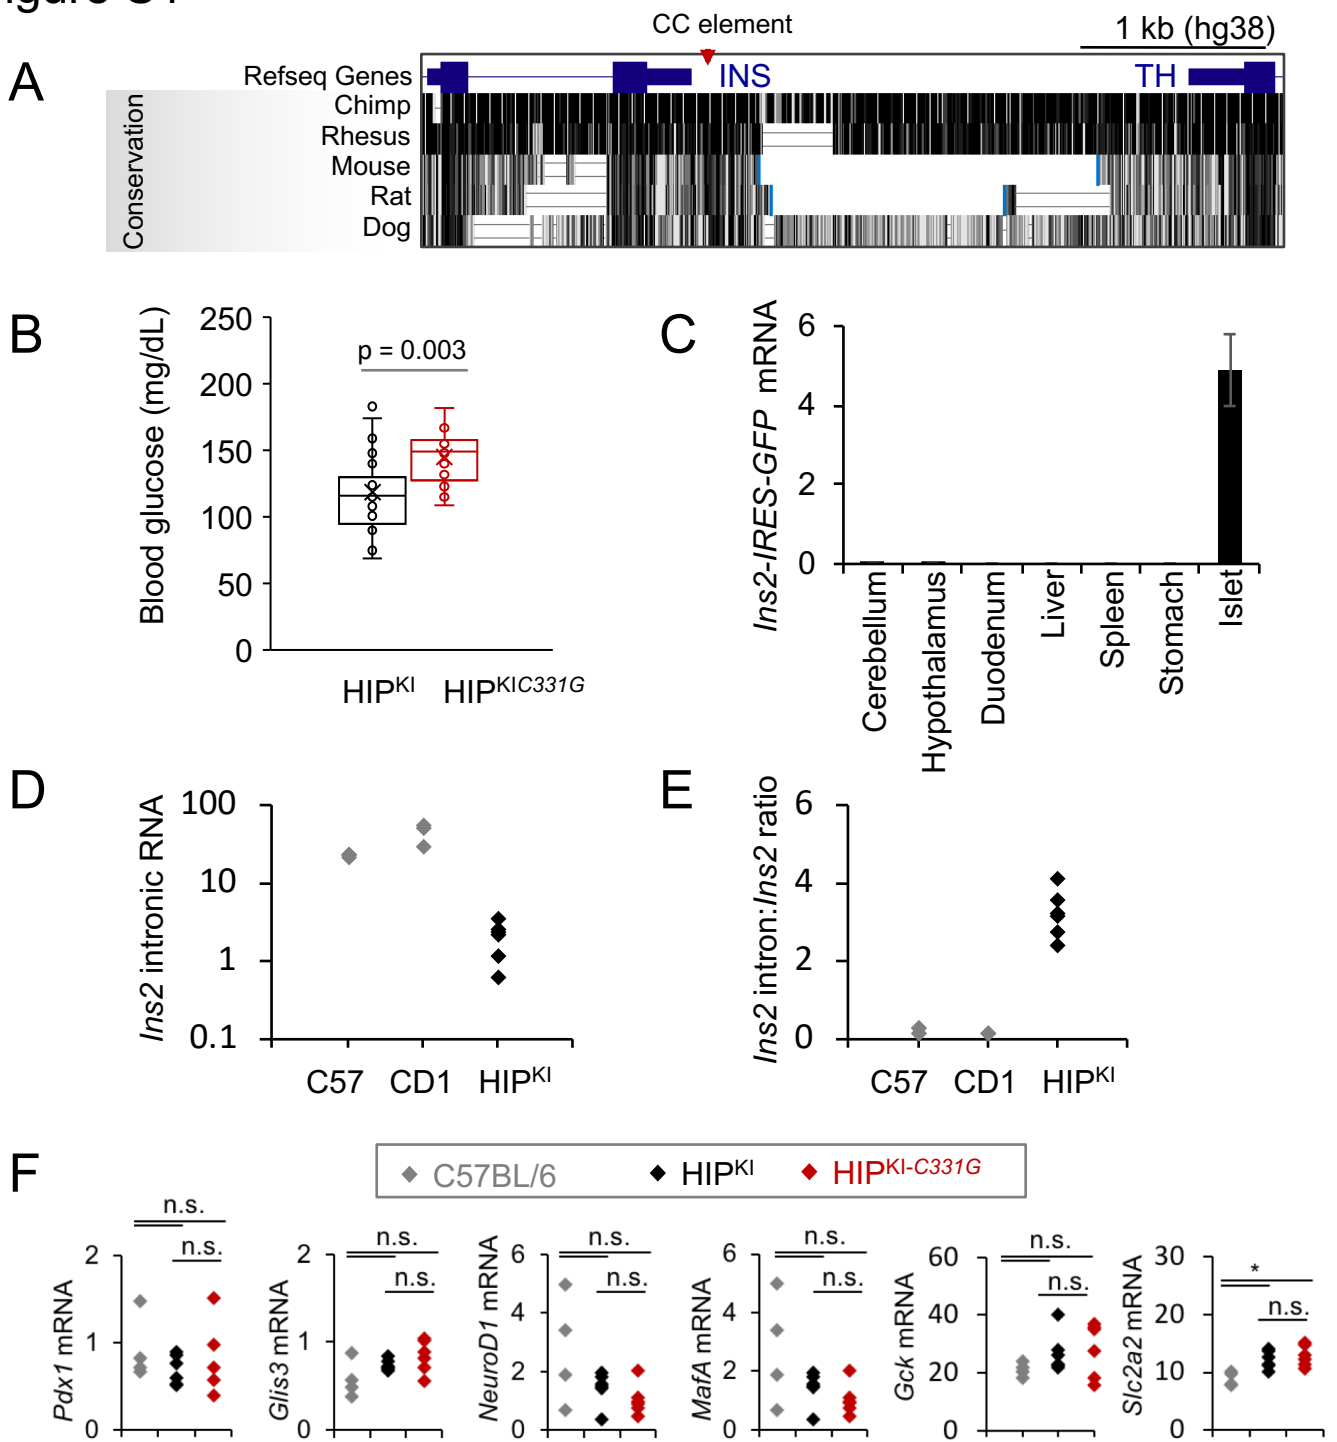

**Figure S1.** Related to Main Figure 1

**(A)** UCSC genome browser snapshot of the region between the *INS* gene and the *TH* gene. Multiz Alignment representing the level of conservation between the displayed species is shown.

**(B)** Glycemia from *ad libitum*-fed HIP<sup>KI</sup> and HIP<sup>KI-C331G</sup> mice. P values were calculated with Student's t test.

**(C)** Quantification of *Ins2-IRES-GFP* mRNA in islets and a panel of tissues in HIP<sup>KI</sup> mice. Bars represent average values normalised to *Actb* mRNA from n=6 mice. Cerebellum and hypothalamus display ~50,000 and ~850,000 fold less *Ins2-IRES-GFP* mRNA respectively, while no transcription is detectable in other tissues.

**(D)** Measurements of intronic *Ins2* transcript levels. *Ins2* intronic transcripts, representing the amount of nascent transcription, was quantified using quantitative PCR with taqman probes in islets isolated from C57BL/6 mice (n=4) or HIP<sup>KI</sup> (n=6).

**(E)** Nascent and spliced *Ins2* RNA ratios in wild type and HIP<sup>KI</sup> mice. Intronic *Ins2* transcript levels and *Ins2* transcript levels were quantified using taqman probes in islets isolated from C57BL/6 mice (n=4) or HIP<sup>KI</sup> (n=6).

**(F)** Reverse transcription quantitative PCR for *Pdx1*, *Glis3*, *NeuroD1*, and *MafA* mRNAs from pancreatic islets from 3-5 month control C57BL/6 (n=4), HIP<sup>KI</sup> (n=6) and HIP<sup>KI-C331G</sup> (n=6) mice. Values were normalized to *Actb* or *Hprt* mRNAs. (\*) Asterisk indicate significance <0.05 by ANOVA unpaired t-test.

# Figure S2

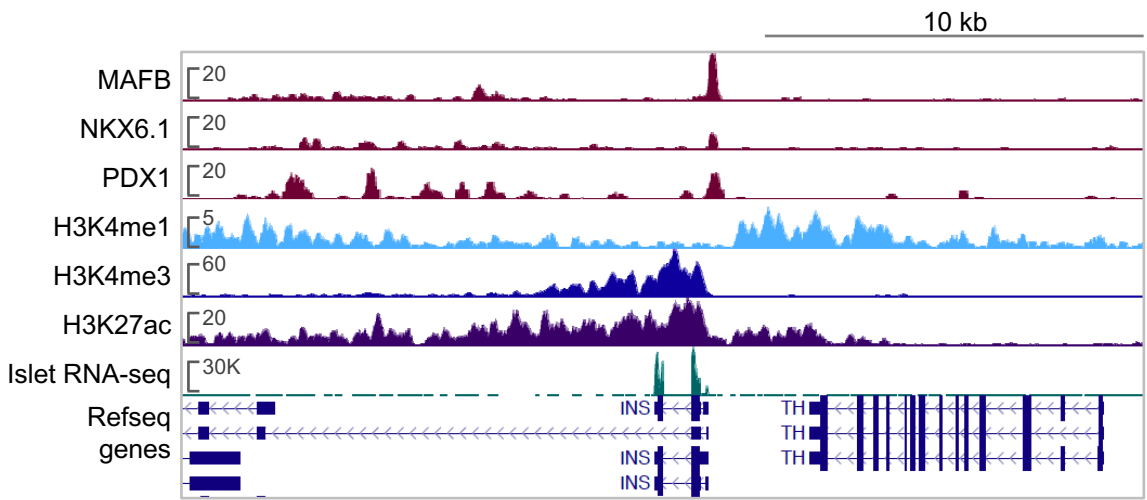

**Figure S2.** Related to Main Figure 4.  
Chromatin landscape of the human *INS* locus in human pancreatic islets. ChIP-seq profiles of activating histone marks H3K4 trimethylation and H3K27 acetylation<sup>12</sup>. All scales represent RPKMs.

# Figure S3

A

| Transcription factor | Identification method                | Activation of wild type <i>INS</i> in episomal assay | Activation of endogenous <i>INS</i> |
|----------------------|--------------------------------------|------------------------------------------------------|-------------------------------------|
| Klf13                | SILAC                                | -                                                    | -                                   |
| Klf16                | SILAC                                | -                                                    | -                                   |
| Maz (PUR1)           | SILAC                                | -                                                    | -                                   |
| Zfp37                | SILAC                                | -                                                    | -                                   |
| SP1                  | in silico motif search               | -                                                    | na                                  |
| Glis2                | Literature (PMID:21127075)           | -                                                    | -                                   |
| Glis3                | Literature (PMID:23927931, 19264802) | +                                                    | +                                   |
| Klf10                | In silico motif search               | -                                                    | -                                   |
| Klf11                | Literature (PMID:21592955, 21592955) | -                                                    | -                                   |

B

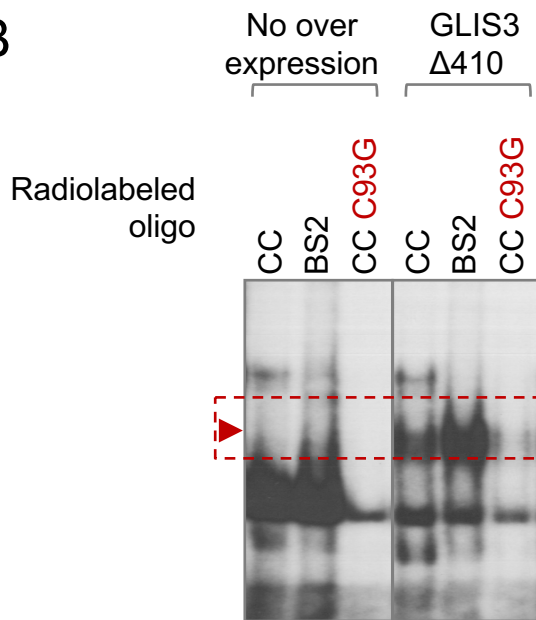

**Figure S3.** Related to Main Figure 6

**(A)** Candidate DNA-binding transcription factor regulators of the *INS* gene that underlie the deleterious effects of the c.-331C>G mutation. Four transcription factors were selected based on differential binding to c.-331C vs. c.-331C>G double stranded oligonucleotides in SILAC experiments in MIN6 b cells, while others were selected based on *in silico* predicted differential binding to c.-331C vs. c.-331C>G *INS* sequences or published studies from indicated references. The summary table emphasizes that amongst these candidates only GLIS3 led to activation of the unmodified episomal insulin promoter plasmid, and activated *INS* mRNA in non-pancreatic cell lines in the presence of islet transcription factors as shown in Figure S5.

**(B)** Electromobility shift assays (EMSA) from HEK 293T cells transfected with human GLIS3 $\Delta$ 410 cDNA show binding to CC element oligonucleotides and BS2, another previously reported GLIS3 recognition sequence in the *INS* 5' flanking regions<sup>29</sup>, but not to the CC element carrying the -331C>G mutation.

# Figure S4

## A

### Top PWMs for known TFs

| Sequence motif | Name                                             | p-value | % of Targets Sequences with Motif | % of Background Sequences with Motif |
|----------------|--------------------------------------------------|---------|-----------------------------------|--------------------------------------|
|                | GLIS3(Zf)/Thyroid-Glis3.GFP-ChIP-Seq(GSE103297)  | 1e-52   | 38.18%                            | 15.21%                               |
|                | Zic3(Zf)/mES-Zic3-ChIP-Seq(GSE37889)             | 1e-27   | 15.62%                            | 4.86%                                |
|                | Unknown-ESC-element/mES-Nanog-ChIP-Seq(GSE11724) | 1e-18   | 10.95%                            | 3.53%                                |

### De novo enriched motif

| p-value:                             | 1.00E-15 |
|--------------------------------------|----------|
| % of Target Sequences with motif     | 18.29%   |
| % of Background Sequences with motif | 8.68%    |

## B

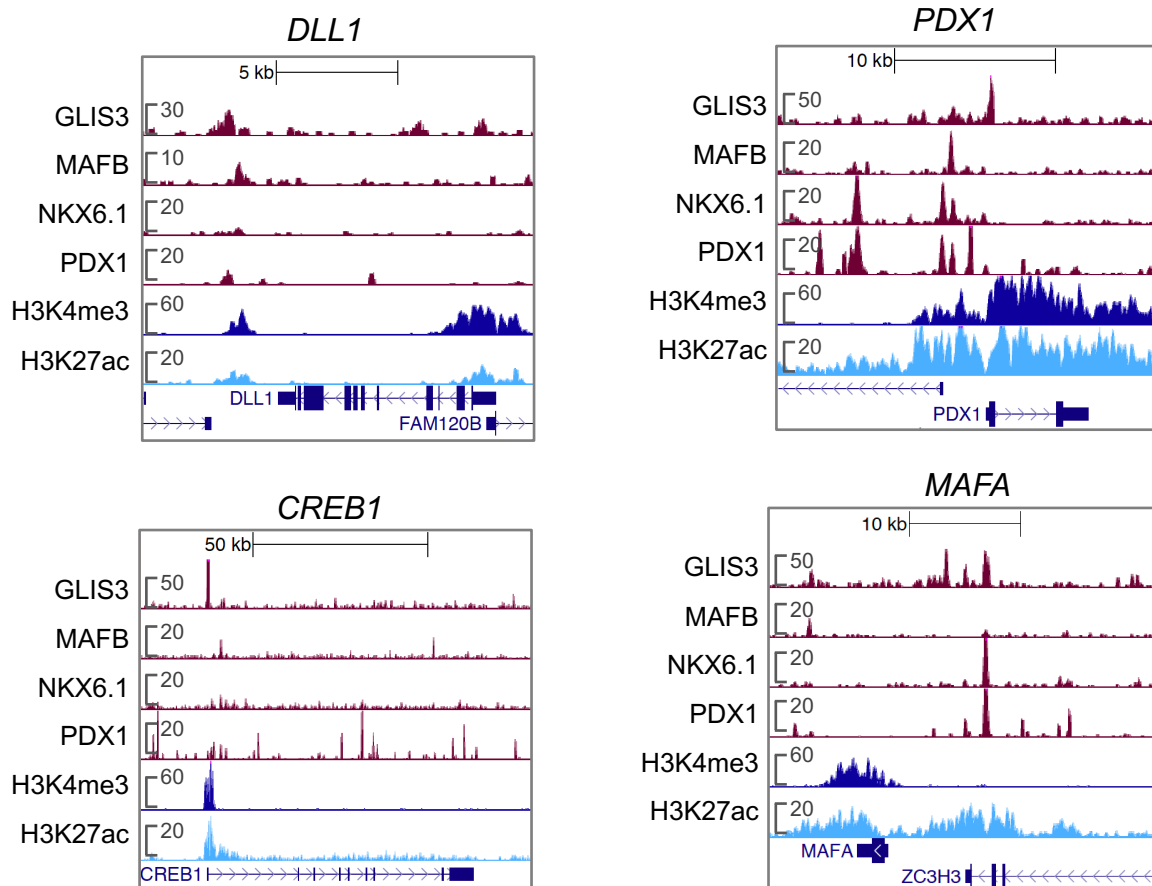

## C

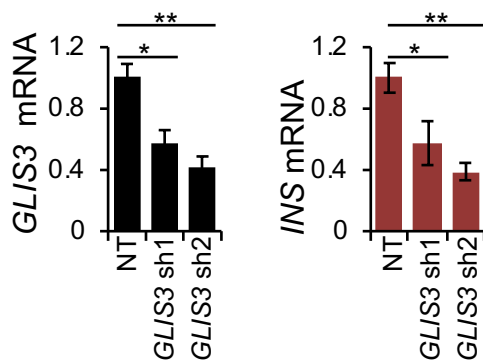

**Figure S4.** Related to Main Figure 6

**(A)** The three most enriched position weight matrixes (PWMs) at GLIS3-bound regions in human islets included a previously identified GLIS3-bound PWM (left panel). Discovery of *de novo* enriched PWMs identified sequence PWMs matching known GLIS3 recognition sequences, including one matching the *INS* CC element (right panel).

**(B)** Examples of GLIS3-bound regions in human pancreatic islets at selected loci, along with binding profiles of other human pancreatic islet transcription factors.

**(C)** Quantitative reverse-transcription PCR of *INS* and *GLIS3* mRNAs after lentiviral-mediated knockdown of *GLIS3*, using two independent shRNA sequences, in EndoCb-H1 human b-cells. Student's t-test \*  $p < 0.05$  or \*\*  $p < 0.001$ .

# Figure S5

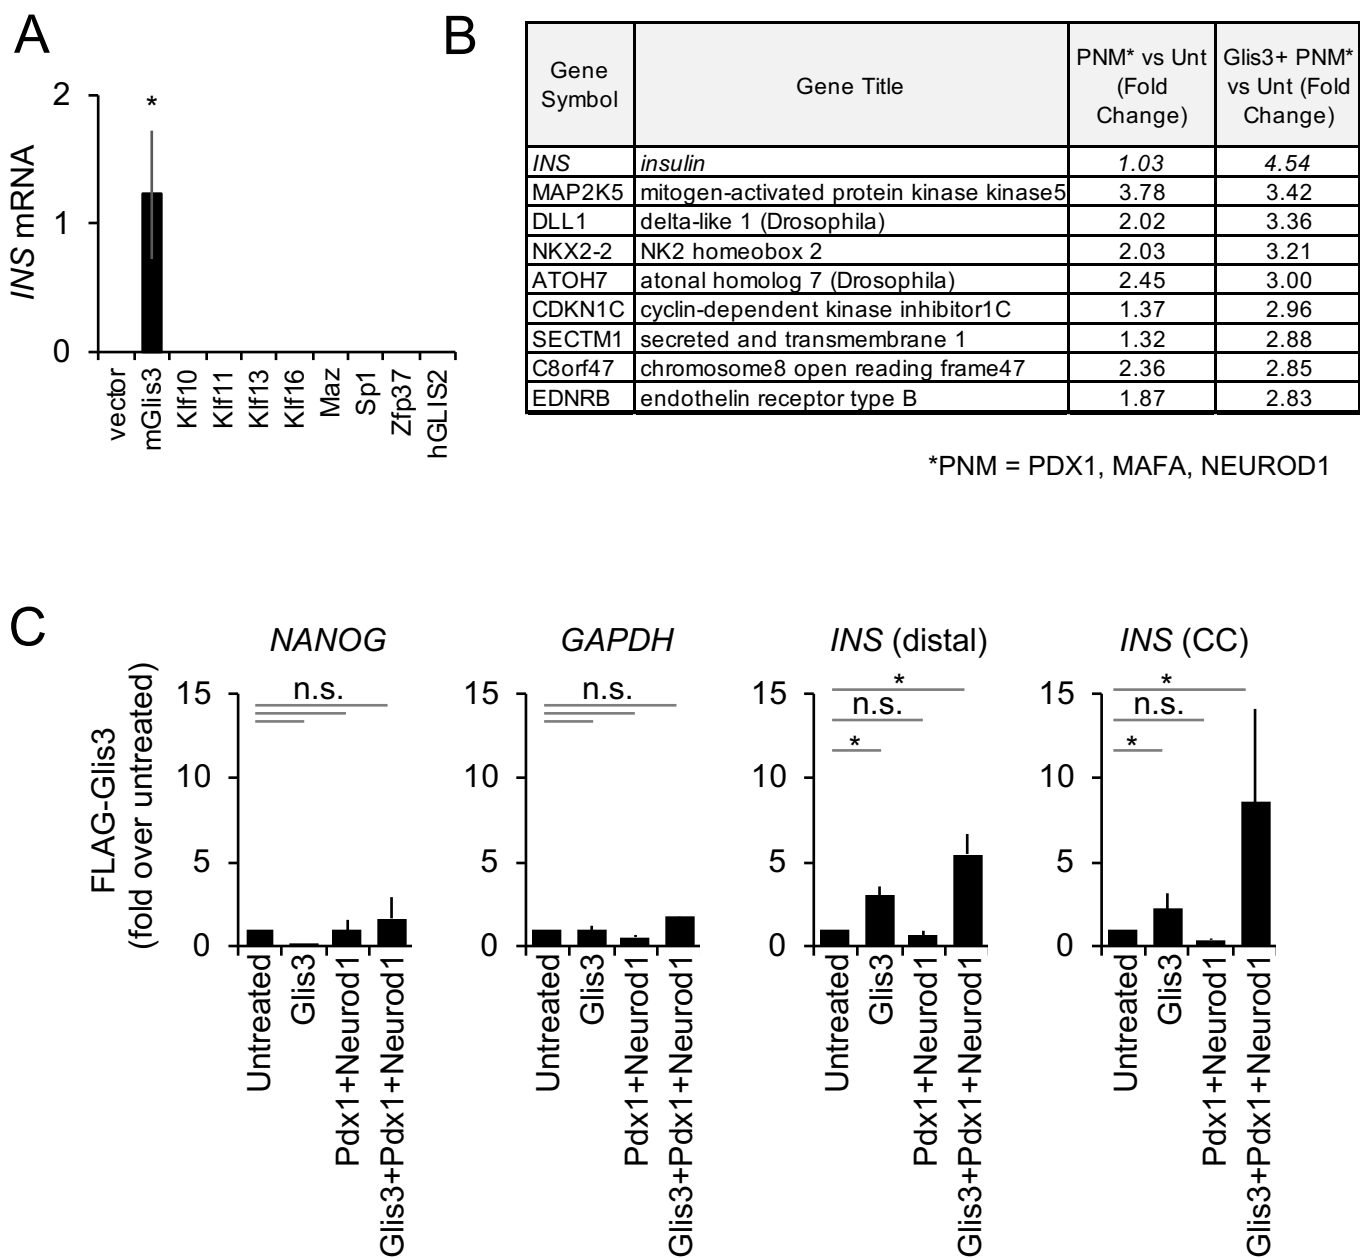

**Figure S5.** Related to Main Figure 6

**(A)** GLIS3, but not other candidate transcription factors that bind CC, activate *INS* in a heterologous cell type. HEK 293T cells were either left untreated (Unt) or transfected with plasmids overexpressing the indicated transcription factors along with NEUROD1 and PDX1. *INS* mRNA are *INS* to *GAPDH* mRNA ratios X 1000. Statistical significance was calculated relative to untreated samples ( $n = 3$  independent experiments). \* Student's t-test,  $p < 0.05$ . Analogous experiments were performed in the presence of MAFA, or NEUROG3 instead of NEUROD1, yielding similar results.

**(B)** Table showing the list of genes most impacted by the overexpression of GLIS3+ PNM (PDX1, NEUROD1, MAFA) vs. PNM alone, in HEK 293T cells. Cells were either left untreated or transfected with the indicated transcription factors. At 3 days post transfection, RNA was quantified using microarrays. Values indicate fold-difference in expression relative to control cells. This experiment was performed with a single replicate and provides an unbiased confirmation that *INS* was the single most induced gene when GLIS3 was added to the transcription factor cocktail.

**(C)** ChIP of FLAG-tagged GLIS3 in HEK 293T cells transfected with the indicated transcription factors. ChIP DNA was quantified by RT-PCR and expressed as percentage of input DNA and as fold enrichment over untreated HEK 293T cells. Statistical significance was calculated relative to untreated (Unt) samples using Student's t-test ( $n=3$  experiments). As expected, *NANOG* promoter and *GAPDH* enhancer showed no changes between treatments.
